# Supplementary material
Source: PubMed Central journal article supplement (PMC5826109)
Supplement: AAC.01814-17_zac003186925s1.pdf [file AAC.01814-17_zac003186925s1.pdf]

**Table S1. Clinical Isolates used in this study**

| Isolate ID | Organism source                | Date of Isolation |
|------------|--------------------------------|-------------------|
| KP1        | Blood Culture                  | 12/04/2016        |
| KP2        | Blood Culture                  | 08/03/2016        |
| KP3        | Tissue                         | 10/01/2016        |
| KP4        | Tissue                         | 07/12/2015        |
| KP5        | Blood Culture                  | 05/10/2015        |
| KP6        | Blood Culture                  | 25/09/2015        |
| KP7        | Blood Culture                  | 01/09/2015        |
| KP8        | Ascitic Fluid                  | 23/02/2015        |
| KP9        | Tissue/Kidney Stone            | 05/12/2014        |
| KP10       | Blood Culture                  | 27/10/2014        |
| KP11       | Screening Swab                 | 10/10/2014        |
| KP12       | Blood Culture                  | 01/10/2014        |
| KP13       | Groin swab                     | 02/07/2014        |
| KP14       | Wound swab                     | 11/06/2014        |
| KP15       | Blood Culture                  | 20/05/2014        |
| KP16       | Blood Culture                  | 20/04/2014        |
| KP17       | Sputum                         | 19/03/2014        |
| KP18       | Catheter urine                 | 18/02/2014        |
| KP19       | Catheter urine                 | 17/10/2013        |
| KP20       | Sputum                         | 01/08/2013        |
| KP21       | Sputum                         | 30/07/2013        |
| KP22       | Blood Culture                  | 27/07/2013        |
| KP23       | Wound swab                     | 23/07/2013        |
| KP24       | Mid-stream urine               | 23/07/2013        |
| KP25       | Blood Culture                  | 22/07/2013        |
| KP26       | Mid-stream urine               | 03/07/2013        |
| KP27       | Central Line Tip               | 17/04/2013        |
| KP28       | Bronchio-alveolar Lavage (BAL) | 11/03/2013        |
| KP30       | Blood Culture                  | 07/08/2012        |
| KP31       | Blood Culture                  | 06/07/2016        |
| KP32       | Tissue                         | 05/07/2016        |
| KP33       | Pus                            | 05/07/2016        |
| KP34       | Tissue                         | 28/06/2016        |
| KP38       | Blood Culture                  | 21/06/2016        |
| KP40       | Blood Culture                  | 09/06/2016        |

|      |                  |            |
|------|------------------|------------|
| KP46 | Tissue           | 22/04/2016 |
| KP47 | Blood Culture    | 22/04/2016 |
| KP48 | Peritoneal Fluid | 01/04/2016 |
| KP50 | Pus              | 23/03/2016 |
| KP59 | Blood Culture    | 25/02/2016 |

**Table S2.** PCR Primers used in this study

| Primer                    | Sequence (5' to 3')                                   | Reference                            |
|---------------------------|-------------------------------------------------------|--------------------------------------|
| gyrA - F                  | AATATGCGCCATCAGCCC                                    | (S1)                                 |
| gyrA - R                  | TGCGAGAGAAATTACACC                                    | (S1)                                 |
| parC - F                  | ATGAGCGATATGGCAGAGC                                   | This work                            |
| parC - R                  | CCACTTCCCGCAGGTTGT                                    | This work                            |
| oqxR - F                  | TTCCTGACGCCGGTGTTTTA                                  | (S2)                                 |
| oqxR - R                  | CTGCGGTGCCAAAAAGAACA                                  | (S2)                                 |
| ramR - F                  | CTGCAGTGCCCGGTGAACCCTGGCGT                            | (S3)                                 |
| ramR - R                  | CTGCAGATTTGCTGATTCAGCAGCGAC                           | (S3)                                 |
| Qnr synthesis             | From: GAGCGCTTGTGTCGCTACAT<br>To: GGTTGCTTCATGGGCAA   | As Accession<br>number<br>AY070235.1 |
| AAC-6'-Ib-cr<br>synthesis | From: GAGCAAACGATCAATGCG<br>To: AAGCCTAGCCAATTTGCTAGG | As Accession<br>number JF775514.1    |

**Table S3.** Mutations identified in the *oqxR*

| Mutant/Isolate | Amino acid position and changes |
|----------------|---------------------------------|
| <i>oqxR1</i>   | Tyr109STOP                      |
| <i>oqxR2</i>   | Leu89FS                         |
| <i>oqxR3</i>   | Ala37Glu                        |
| <i>oqxR4</i>   | Ala133Val                       |
| <i>oqxR5</i>   | Arg93Cys                        |
| <i>oqxR6</i>   | Glu85STOP                       |
| <i>oqxR7</i>   | Gln21STOP                       |
| <i>oqxR8</i>   | Glu116STOP                      |
| <i>oqxR9</i>   | Asp3Glu                         |
| <i>oqxR10</i>  | Ala133Pro                       |
| <i>oqxR11</i>  | Ala37Glu                        |
| <i>oqxR12</i>  | Gly63 ins SIHLGRNG              |
| KP9            | Glu24STOP                       |
| KP12           | Asp3Tyr                         |
| KP20           | Ala19Val                        |
| KP28           | Leu76FS                         |
| KP30           | Val130Ala                       |

Effects on OqxR sequence of mutations identified in *oqxR* in Ecl8 mutants (alleles *oqxR1* to 12) or in the *K. pneumoniae* clinical isolates (KP9, 12 etc). All these mutations have been shown to result in loss of function, and so OqxAB hyper-production.

**Table S4:** Disc susceptibility testing according to CLSI protocol (26) for *K. pneumoniae* Ecl8 and mutants determining the effect of acquisition events on Fluoroquinolone susceptibility.

| Parental strain <sup>a</sup> ,<br>mutation<br>(transformed<br>plasmid) | Susceptibility/Non-Susceptibility to |     |     |     | Mutation/Transformation            |
|------------------------------------------------------------------------|--------------------------------------|-----|-----|-----|------------------------------------|
|                                                                        | CIP                                  | LEV | NOR | OFL |                                    |
| Ecl8                                                                   | S                                    | S   | S   | S   | Wildtype                           |
| Ecl8 (pEX-K4)                                                          | S                                    | S   | S   | S   | Vector only                        |
| <b>Single acquisition events</b>                                       |                                      |     |     |     |                                    |
| <i>gyrA1</i>                                                           | S                                    | S   | S   | S   | GyrA:Ser83Phe                      |
| <i>gyrA2</i>                                                           | S                                    | S   | S   | S   | GyrA Ser83Tyr                      |
| <i>gyrA3</i>                                                           | S                                    | S   | S   | S   | GyrA Asp87Tyr                      |
| <i>oqxR1</i>                                                           | S                                    | S   | S   | S   | OqxR:Tyr109STOP                    |
| <i>oqxR2</i>                                                           | S                                    | S   | S   | S   | OqxR:Leu89FS                       |
| <i>oqxR3</i>                                                           | S                                    | S   | S   | S   | OqxR:Ala37Glu                      |
| <i>oqxR4</i>                                                           | S                                    | S   | S   | S   | OqxR:Ala133Val                     |
| $\Delta ramR$                                                          | S                                    | S   | S   | S   | deleted RamR                       |
| <i>ramR</i>                                                            | S                                    | S   | S   | S   | RamR:Thr124Pro                     |
| ( <i>qnrA1</i> )                                                       | S                                    | S   | S   | S   | QnrA1                              |
| ( <i>aac(6')-Ib-cr</i> )                                               | S                                    | S   | S   | S   | Aac(6')-Ib-cr                      |
| <b>Double acquisition events</b>                                       |                                      |     |     |     |                                    |
| <i>oqxR1</i> + <i>gyrA2</i>                                            | NS                                   | NS  | NS  | NS  | OqxR:Tyr109STOP +<br>GyrA:Ser83Tyr |
| $\Delta ramR$ + <i>gyrA1</i>                                           | NS                                   | NS  | S   | NS  | deleted RamR + GyrA:Ser83Phe       |
| $\Delta ramR$ + <i>oqxR5</i>                                           | S                                    | S   | NS  | S   | deleted RamR + OqxR:Arg93Cys       |
| ( <i>qnrA1</i> + <i>aac(6')-Ib-cr</i> )                                | S                                    | S   | S   | S   | QnrA1+ Aac(6')-Ib-cr               |
| <i>gyrA1</i> (pEX-K4)                                                  | S                                    | S   | S   | S   | GyrA:Ser83Phe Vector only          |
| <i>gyrA1</i> ( <i>qnrA1</i> )                                          | S                                    | S   | S   | S   | GyrA:Ser83Phe + QnrA1              |
| <i>gyrA1</i> ( <i>aac(6')-Ib-cr</i> )                                  | S                                    | S   | S   | S   | GyrA:Ser83Phe + Aac(6')-Ib-cr      |

|                                               |    |    |    |    |                                    |
|-----------------------------------------------|----|----|----|----|------------------------------------|
| <i>oqxR1</i> (pEX-K4)                         | S  | S  | S  | S  | OqxR:Tyr109STOP Vector only        |
| <i>oqxR1</i> ( <i>qnrA1</i> )                 | NS | NS | NS | NS | OqxR:Tyr109STOP + QnrA1            |
| <i>oqxR1</i> ( <i>aac(6')-Ib-cr</i> )         | S  | S  | S  | S  | OqxR:Tyr109STOP +<br>Aac(6')-Ib-cr |
| $\Delta$ <i>ramR</i> (pEX-K4)                 | S  | S  | S  | S  | deleted RamR Vector only           |
| $\Delta$ <i>ramR</i> ( <i>qnrA1</i> )         | NS | NS | NS | NS | deleted RamR + QnrA1               |
| $\Delta$ <i>ramR</i> ( <i>aac(6')-Ib-cr</i> ) | S  | S  | S  | S  | deleted RamR + Aac(6')-Ib-cr       |

### Triple acquisition events

|                                                                 |    |    |    |    |                                                    |
|-----------------------------------------------------------------|----|----|----|----|----------------------------------------------------|
| $\Delta$ <i>ramR</i> + <i>oqxR5</i> + <i>gyrA1</i>              | NS | NS | NS | NS | deleted RamR + OqxR:Arg93Cys +<br>GyrA:Ser83Phe    |
| <i>gyrA1</i> ( <i>qnrA1</i> +<br><i>aac(6')-Ib-cr</i> )         | NS | S  | NS | S  | GyrA:Ser83Phe + QnrA1 +<br>Aac(6')-Ib-cr           |
| <i>oqxR1</i> ( <i>qnrA1</i> +<br><i>aac(6')-Ib-cr</i> )         | NS | S  | NS | NS | OqxR:Tyr109STOP + QnrA1 +<br>Aac(6')-Ib-cr         |
| $\Delta$ <i>ramR</i> ( <i>qnrA1</i> + <i>aac(6')-Ib-cr</i> )    | NS | S  | S  | S  | deleted RamR + QnrA1+<br>Aac(6')-Ib-cr             |
| <i>oqxR1</i> + <i>gyrA2</i> (pEX-K4)                            | NS | NS | NS | NS | OqxR:Tyr109STOP +<br>GyrA:Ser83Tyr Vector only     |
| <i>oqxR1</i> + <i>gyrA2</i> ( <i>qnrA1</i> )                    | NS | NS | NS | NS | OqxR:Tyr109STOP +<br>GyrA:Ser83Tyr + QnrA1         |
| <i>oqxR1</i> + <i>gyrA2</i><br>( <i>aac(6')-Ib-cr</i> )         | NS | NS | NS | NS | OqxR:Tyr109STOP +<br>GyrA:Ser83Tyr + Aac(6')-Ib-cr |
| $\Delta$ <i>ramR</i> + <i>gyrA1</i> (pEX-K4)                    | NS | NS | S  | NS | deleted RamR + GyrA:Ser83Phe<br>Vector only        |
| $\Delta$ <i>ramR</i> + <i>gyrA1</i> ( <i>qnrA1</i> )            | NS | NS | NS | NS | deleted RamR + GyrA:Ser83Phe +<br>QnrA1            |
| $\Delta$ <i>ramR</i> + <i>gyrA1</i><br>( <i>aac(6')-Ib-cr</i> ) | NS | S  | NS | S  | deleted RamR + GyrA:Ser83Phe +<br>Aac(6')-Ib-cr    |
| $\Delta$ <i>ramR</i> + <i>oqxR5</i> (pEX-K4)                    | S  | S  | S  | S  | deleted RamR + OqxR:Arg93Cys<br>Vector only        |
| $\Delta$ <i>ramR</i> + <i>oqxR5</i> ( <i>qnrA1</i> )            | NS | NS | NS | NS | deleted RamR + OqxR:Arg93Cys +<br>QnrA1            |
| $\Delta$ <i>ramR</i> + <i>oqxR5</i> ( <i>aac(6')-Ib-cr</i> )    | S  | S  | S  | S  | deleted RamR + OqxR:Arg93Cys +<br>Aac(6')-Ib-cr    |

### Quadruple acquisition events

|                                                                                    |    |    |    |    |                                                              |
|------------------------------------------------------------------------------------|----|----|----|----|--------------------------------------------------------------|
| <b><i>oqxR1 + gyrA2</i><br/>(<i>qnrA1 + aac(6')-Ib-cr</i>)</b>                     | NS | NS | NS | NS | OqxR:Tyr109STOP + GyrA:Ser83Tyr + QnrA1 + Aac(6')-Ib-cr      |
| <b><math>\Delta</math><i>ramR + gyrA1</i><br/>(<i>qnrA1 + aac(6')-Ib-cr</i>)</b>   | NS | NS | NS | NS | deleted RamR + GyrA:Ser83Phe + QnrA1 + Aac(6')-Ib-cr         |
| <b><math>\Delta</math><i>ramR + oqxR5 +</i><br/>(<i>qnrA1 + aac(6')-Ib-cr</i>)</b> | NS | NS | NS | NS | deleted RamR + OqxR:Arg93Cys + QnrA1 + Aac(6')-Ib-cr         |
| <b><math>\Delta</math><i>ramR + oqxR5 + gyrA1</i><br/>(pEXK4)</b>                  | NS | NS | NS | NS | deleted RamR + OqxR:Arg93Cys + GyrA:Ser83Phe Vector only     |
| <b><math>\Delta</math><i>ramR + oqxR5 + gyrA1</i><br/>(<i>qnrA1</i>)</b>           | NS | NS | NS | NS | deleted RamR + OqxR:Arg93Cys + GyrA:Ser83Phe + QnrA1         |
| <b><math>\Delta</math><i>ramR + oqxR5 + gyrA1</i><br/>(<i>aac(6')-Ib-cr</i>)</b>   | NS | NS | NS | NS | deleted RamR + OqxR:Arg93Cys + GyrA:Ser83Phe + Aac(6')-Ib-cr |

### Quintuple acquisition event

|                                                                                          |    |    |    |    |                                                                      |
|------------------------------------------------------------------------------------------|----|----|----|----|----------------------------------------------------------------------|
| <b><math>\Delta</math><i>ramR + oqxR5 + gyrA1</i><br/>(<i>qnrA1 + aac(6')-Ib-cr</i>)</b> | NS | NS | NS | NS | deleted RamR + OqxR:Arg93Cys + GyrA:Ser83Phe + QnrA1 + Aac(6')-Ib-cr |
|------------------------------------------------------------------------------------------|----|----|----|----|----------------------------------------------------------------------|

<sup>a</sup> *K. pneumoniae* Ecl8 is the parental strain in all cases.

<sup>b</sup> CIP, ciprofloxacin; LEV, levofloxacin; NOR, norfloxacin; OFL, ofloxacin

Zone diameter values for definition of susceptible (S) /non-susceptible (NS) designation were the means of three repetitions rounded to the nearest integer. Definitions were made by reference to susceptibility breakpoints set by the CLSI (29).

**Table S5: Initial predictive rules and “reduced permeability correction” for ciprofloxacin susceptibility in *K. pneumoniae***

| Rule number | Mutations identified in proteins |      |      | Presence of PMQR |               | Phenotype                    | “RP” Phenotype |
|-------------|----------------------------------|------|------|------------------|---------------|------------------------------|----------------|
|             | GyrA QRDR                        | OqxR | RamR | Qnr              | Aac(6')-Ib-cr | (MIC [mg.mL <sup>-1</sup> ]) |                |
| 1           | +                                |      |      |                  |               | S (0.25)                     | S (1)          |
| 2           |                                  | +    |      |                  |               | S (0.25)                     | S (1)          |
| 3           |                                  |      | +    |                  |               | S (0.125)                    | S (0.5)        |
| 4           |                                  |      |      | +                |               | S (0.063)                    | S (0.25)       |
| 5           |                                  |      |      |                  | +             | S (0.016)                    | S (0.063)      |
| 6           | +                                | +    |      |                  |               | NS                           | NS             |
| 7           | +                                |      | +    |                  |               | NS                           | NS             |
| 8           | +                                |      |      | +                |               | S (1)                        | NS (4)         |
| 9           | +                                |      |      |                  | +             | S (0.5)                      | NS (2)         |
| 10          |                                  | +    | +    |                  |               | S (0.25)                     | S (1)          |
| 11          |                                  | +    |      | +                |               | NS                           | NS             |
| 12          |                                  | +    |      |                  | +             | S (0.5)                      | NS (2)         |
| 13          |                                  |      | +    | +                |               | NS                           | NS             |
| 14          |                                  |      | +    |                  | +             | S (0.063)                    | S (0.25)       |
| 15          |                                  |      |      | +                | +             | S (0.5)                      | NS (2)         |
| 16          | +                                | +    | +    |                  |               | NS                           | NS             |
| 17          | +                                | +    |      | +                |               | NS                           | NS             |
| 18          | +                                | +    |      |                  | +             | NS                           | NS             |



|    |   |   |   |   |   |       |        |
|----|---|---|---|---|---|-------|--------|
| 19 | + |   | + | + |   | NS    | NS     |
| 20 | + |   | + |   | + | NS    | NS     |
| 21 | + |   |   | + | + | NS    | NS     |
| 22 |   | + | + | + |   | NS    | Ns     |
| 23 |   | + | + |   | + | S (1) | NS (4) |
| 24 |   | + |   | + | + | NS    | NS     |
| 25 |   |   | + | + | + | NS    | NS     |
| 26 | + | + | + | + |   | NS    | NS     |
| 27 | + | + | + |   | + | NS    | NS     |
| 28 | + | + |   | + | + | NS    | NS     |
| 29 | + |   | + | + | + | NS    | NS     |
| 30 |   | + | + | + | + | NS    | NS     |
| 31 | + | + | + | + | + | NS    | NS     |

+, mutation identified or PMQR present, blank; no mutation or PMQR absent, NS (Non-susceptible) and shaded blue. S; susceptible and not shaded as defined in Table S4

“RP” (Reduced Permeability) rules to be applied when the OmpF:OmpC ratio is <0.5.

MICs were determined when isolates were designated susceptible, RP correction is 4-fold, as described in the text. Susceptibility breakpoints applied for these isolates are MIC breakpoints defined by CLSI (29).

**Table S6: Final predictive rules for ciprofloxacin susceptibility in *K. pneumoniae* clinical isolates.**

| Rule number | Mutations identified in proteins |                                     |      |      | Presence of PMQR |               | Phenotype (MIC [mg.mL <sup>-1</sup> ]) |
|-------------|----------------------------------|-------------------------------------|------|------|------------------|---------------|----------------------------------------|
|             | 1st GyrA QRDR                    | 2 <sup>nd</sup> QRDR (ParC or GyrA) | OqxR | RamR | Qnr              | Aac(6')-Ib-cr |                                        |
| 1RP         | +                                |                                     |      |      |                  |               | S (1)                                  |
| 2RP         |                                  |                                     | +    |      |                  |               | S (1)                                  |
| 3RP         |                                  |                                     |      | +    |                  |               | S (0.5)                                |
| 4RP         |                                  |                                     |      |      | +                |               | S (0.25)                               |
| 5RP         |                                  |                                     |      |      |                  | +             | S (0.063)                              |
| 6RP         | +                                |                                     | +    |      |                  |               | NS                                     |
| 7RP         | +                                |                                     |      | +    |                  |               | NS                                     |
| 8RP         | +                                |                                     |      |      | +                |               | NS (4)                                 |
| 9RP         | +                                |                                     |      |      |                  | +             | NS (2)                                 |
| 10RP        |                                  |                                     | +    | +    |                  |               | S (1)                                  |
| 11RP        |                                  |                                     | +    |      | +                |               | NS                                     |
| 12RP        |                                  |                                     | +    |      |                  | +             | NS (2)                                 |
| 13RP        |                                  |                                     |      | +    | +                |               | NS                                     |
| 14RP        |                                  |                                     |      | +    |                  | +             | S (0.25)                               |
| 15RP        |                                  |                                     |      |      | +                | +             | NS (2)                                 |
| 16RP        | +                                |                                     | +    | +    |                  |               | NS                                     |
| 17RP        | +                                |                                     | +    |      | +                |               | NS                                     |

|      |   |   |   |   |   |   |        |
|------|---|---|---|---|---|---|--------|
| 18RP | + |   | + |   |   | + | NS     |
| 19RP | + |   |   | + | + |   | NS     |
| 20RP | + |   |   | + |   | + | NS     |
| 21RP | + |   |   |   | + | + | NS     |
| 22RP |   |   | + | + | + |   | Ns     |
| 23RP |   |   | + | + |   | + | NS (4) |
| 24RP |   |   | + |   | + | + | NS     |
| 25RP |   |   |   | + | + | + | NS     |
| 26RP | + |   | + | + | + |   | NS     |
| 27RP | + |   | + | + |   | + | NS     |
| 28RP | + |   | + |   | + | + | NS     |
| 29RP | + |   |   | + | + | + | NS     |
| 30RP |   |   | + | + | + | + | NS     |
| 31RP | + |   | + | + | + | + | NS     |
| 32RP | + | + |   |   |   |   | NS (4) |
| 33RP | + | + | + |   |   |   | NS     |
| 34RP | + | + |   | + |   |   | NS     |
| 35RP | + | + |   |   | + |   | NS     |
| 36RP | + | + |   |   |   | + | NS     |
| 37RP | + | + | + | + |   |   | NS     |
| 38RP | + | + | + |   | + |   | NS     |
| 39RP | + | + | + |   |   | + | NS     |
| 40RP | + | + |   | + | + |   | NS     |

|      |   |   |   |   |   |   |    |
|------|---|---|---|---|---|---|----|
| 41RP | + | + |   | + |   | + | NS |
| 42RP | + | + |   |   | + | + | NS |
| 43RP | + | + | + | + | + |   | NS |
| 44RP | + | + | + | + |   | + | NS |
| 45RP | + | + | + |   | + | + | NS |
| 46RP | + | + |   | + | + | + | NS |
| 47RP | + | + | + | + | + | + | NS |

+, mutation identified or PMQR present, blank; no mutation or PMQR absent,

NS (Non-susceptible) and shaded blue. S; susceptible and not shaded

## Supplementary References

- S1. Fu Y, Zhang W, Wang H, Zhao S, Chen Y, Meng F, Zhang Y, Xu H, Chen X, Zhang F. 2013. Specific patterns of gyr A mutations determine the resistance difference to ciprofloxacin and levofloxacin in *Klebsiella pneumoniae* and *Escherichia coli*. *BMC Infect Dis* 13:8.
- S2. Bialek-Davenet S, Lavigne J-P, Guyot K, Mayer N, Tournebize R, Brisse S, Leflon-Guibout V, Nicolas-Chanoine M-H. 2015. Differential contribution of AcrAB and OqxAB efflux pumps to multidrug resistance and virulence in *Klebsiella pneumoniae*. *J Antimicrob Chemother* 70:81–8.
- S3. Hentschke M, Wolters M, Sobottka I, Rohde H, Aepfelbacher M. 2010. ramR mutations in clinical isolates of *Klebsiella pneumoniae* with reduced susceptibility to tigecycline. *Antimicrob Agents Chemother* 54:2720–3.
